1 **Double-dose mRNA vaccination to SARS-CoV-2 progressively increases recognition of**  
2 **variants-of-concern by Spike RBD-specific memory B cells**

3

4 Gemma E. Hartley<sup>1</sup>, Emily S.J. Edwards<sup>1</sup>, Nirupama Varese<sup>1</sup>, Irene Boo<sup>2</sup>, Pei M. Aui<sup>1</sup>, Scott  
5 J. Bornheimer<sup>3</sup>, P. Mark Hogarth<sup>1,4,5</sup>, Heidi E. Drummer<sup>2,6,7</sup>, Robyn E. O’Hehir<sup>1,8</sup> and Menno  
6 C. van Zelm<sup>1,8\*</sup>

7

8 <sup>1</sup> Allergy and Clinical Immunology Laboratory, Department of Immunology and Pathology,  
9 Central Clinical School, Monash University, Melbourne, VIC, Australia;

10 <sup>2</sup> Viral Entry and Vaccines Group, Burnet Institute, Melbourne, VIC, Australia;

11 <sup>3</sup> BD Biosciences, San Jose, CA, USA;

12 <sup>4</sup> Immune Therapies Group, Burnet Institute, Melbourne, VIC, Australia;

13 <sup>5</sup> Department of Pathology, The University of Melbourne, Parkville, VIC, Australia;

14 <sup>6</sup> Department of Microbiology and Immunology, Peter Doherty Institute for Infection and  
15 Immunity, University of Melbourne, Melbourne, VIC, Australia;

16 <sup>7</sup> Department of Microbiology, Monash University, Clayton, VIC, Australia;

17 <sup>8</sup> Allergy, Asthma and Clinical Immunology Service, Alfred Hospital, Melbourne, VIC,  
18 Australia

19

20 \* **Corresponding author:** Menno C. van Zelm, Department of Immunology and Pathology,  
21 Central Clinical School, Monash University, 89 Commercial Road, Melbourne, VIC 3004,  
22 Australia. Email: [menno.vanzelm@monash.edu](mailto:menno.vanzelm@monash.edu)

23

24 **KEYWORDS (5):** SARS-CoV-2, COVID-19, memory B cells, antibodies, variants of  
25 concern

26 **ABSTRACT**

27 **Background:** SARS-CoV-2 vaccination with BNT162b2 (Pfizer BioNTech) has been shown  
28 to be 95% effective.<sup>1</sup> Double-dose vaccination generates high levels of spike-specific  
29 antibodies, memory B cells (Bmem) and T cells. However, variants of concern (VoC) with  
30 mutations in the spike Receptor Binding Domain (RBD) can evade antibody responses.  
31 Booster vaccinations improve antibody recognition of VoC, but it is unclear if this is due to  
32 higher total antibodies or their capacity to bind VoC. We here addressed the capacity of  
33 surface Ig on single Wuhan-specific Bmem after first and second dose BNT162b2  
34 vaccination to recognize variant RBD.

35 **Methods:** Samples were collected from 30 healthy COVID-19 naive individuals pre-  
36 BNT162b2 vaccination, 3 weeks post-dose 1 and 4-weeks post-dose 2. Plasma antibodies and  
37 Bmem were evaluated using recombinant RBD proteins of the Wuhan, Gamma and Delta  
38 strains.

39 **Results:** All individuals generated a robust antibody response to BNT162b2 vaccination with  
40 all participants producing neutralizing antibodies following dose 2. IgM<sup>+</sup> and IgG<sup>+</sup> RBD-  
41 specific Bmem were generated after one vaccine dose, and those expressing IgG1 increased  
42 in absolute number after dose 2. The majority of RBD-specific Bmem bound the Gamma  
43 and/or Delta variants, and this proportion significantly increased after the second dose.

44 **Conclusion:** The second dose of BNT162b2 increases the number of circulating Ig-class  
45 switched RBD-specific Bmem. Importantly, the second dose of vaccination is required for a  
46 high frequency of RBD-specific Bmem to recognize Gamma and Delta variants. This  
47 suggests that dose 2 not only increases the number of RBD-specific Bmem but also the  
48 affinity of the Bmem to overcome the point mutations in VoC.

## 49 INTRODUCTION

50 The coronavirus disease-2019 (COVID-19) pandemic has now entered its third year. The  
51 virus responsible, severe acute respiratory syndrome coronavirus-2 (SARS-CoV-2) has  
52 caused ~530 million infections and over 6 million deaths worldwide.<sup>2</sup> The combined effort of  
53 the scientific community has allowed the rapid production and administration of effective  
54 SARS-CoV-2 vaccines.<sup>1,3,4</sup> In developed countries, vaccination rates are high (60-90%),  
55 resulting in a reduction of severe disease and hospitalization.<sup>5,6</sup> In Australia, the ChAdOx1  
56 nCoV-19 (AstraZeneca, adenoviral vector) and BNT162b2 (Pfizer-BioNTech, mRNA)  
57 vaccines were widely used for the primary double-dose schedule.<sup>7</sup> Both the BNT162b2 and  
58 mRNA-1273 (Moderna, mRNA) vaccines are now recommended as a 3<sup>rd</sup> dose booster for  
59 all >16 years of age, and a 4<sup>th</sup> dose for risk groups.<sup>8</sup>

60 All three vaccines target the SARS-CoV-2 spike protein.<sup>1,3,4</sup> Antibodies directed towards  
61 the Spike receptor binding domain (RBD) prevent binding to the host receptor Angiotensin-  
62 converting enzyme 2 (ACE2) and hence can neutralize the virus.<sup>9,10</sup> After double dose SARS-  
63 CoV-2 vaccination, spike-specific antibodies are generated in large quantities peaking  
64 between 15-20 days and then begin to decline thereafter as part of the contraction of the  
65 immune response.<sup>11-13</sup>

66 In addition to serum antibodies, SARS-CoV-2 vaccination elicits the formation of Spike-  
67 specific memory B cells (Bmem), which predominantly carry surface Ig of either the IgM or  
68 IgG isotype.<sup>14,15</sup> The second vaccine dose is reported to reduce the proportion of IgM<sup>+</sup> Bmem  
69 with a corresponding increase in IgG<sup>+</sup> Bmem frequencies,<sup>12,14,15</sup> suggestive of re-activation of  
70 pre-existing Bmem in a secondary germinal center (GC) with further affinity maturation  
71 following somatic hypermutation (SHM). In humans, CD27<sup>+</sup>IgM<sup>+</sup>IgD<sup>-</sup> and CD27<sup>+</sup>IgG<sup>+</sup>  
72 Bmem originate predominantly from primary GC reactions, whereas CD27<sup>+</sup>IgG<sup>+</sup>, CD27<sup>+</sup>IgA<sup>+</sup>

73 and CD27<sup>+</sup>IgE<sup>+</sup> Bmem display molecular signs of secondary GC responses with higher SHM  
74 and increased replication histories.<sup>16-18</sup>

75 Despite vaccine roll-out in 2021, multiple new variants of concern (VoC) have emerged.  
76 VoC are SARS-CoV-2 strains that are deemed by the World Health Organization (WHO) as  
77 variants that either increase transmission, disease severity or decrease the effect of public  
78 health measures such as vaccination.<sup>19</sup> VoC Beta (P.1) and Gamma (B.1.351) are mutated at  
79 3 residues within the receptor binding domain (RBD): K417N (Beta) / K417T (Gamma),  
80 E484K and N501Y.<sup>19</sup> The shared E484K mutation results in a 2-6 fold reduction in binding  
81 of Wuhan-specific antibodies.<sup>20,21</sup> In contrast, Delta (B.1.617) carries two mutations in the  
82 RBD: L452R and T478K. Both the E484K and L45R mutations are located within the RBD-2  
83 epitopic region, and can impact antibody neutralization capacity.<sup>22</sup> Still, antibody recognition  
84 of Beta and Gamma are more greatly impacted than Delta.<sup>20,23-27</sup>

85 In previously-infected individuals, one vaccine dose elicits neutralizing levels of  
86 antibody to VoC to the same degree as two doses in naive individuals.<sup>14</sup> This suggests that re-  
87 activation of pre-existing Bmem to undergo a secondary GC response improves recognition  
88 of VoCs.<sup>14,27</sup> However, this has not been addressed in single Bmem cells.

89 Whilst Australia did not escape community transmission in 2020 and 2021, cases were  
90 minimal, and the vast majority of the population was infection-naive during the first year of  
91 the vaccine rollout.<sup>28</sup> Therefore, this population is well-suited to examine Bmem formation  
92 after prime and boost vaccination in the absence of SARS-CoV-2 infection. Samples were  
93 taken 3-4 weeks following vaccine doses to evaluate the resting Bmem compartment.<sup>29,30</sup>  
94 Using fluorescently-labelled recombinant RBD tetramers, we here examined the SARS-CoV-  
95 2-specific Bmem compartment in 30 healthy adults after first and second dose BNT162b2 for  
96 their immunophenotype and capacity to bind to the Gamma and Delta variant RBD.

## 97 **METHODS**

### 98 **Participants**

99 Healthy individuals without hematological or immunological disease were enrolled in a low-  
100 risk research study to examine their peripheral blood B-cell subsets (Alfred Health ethics no.  
101 32-21/Monash University project no. 72794). From February to June 2021, 30 individuals,  
102 who had decided to take the COVID-19 vaccine, consented to three donations of 40ml of  
103 blood as well as the collection of basic demographics (age and sex). All individuals were  
104 vaccinated with two doses of BNT162b2 (Pfizer-BioNTech) as per the manufacturer's  
105 recommendation. Samples were taken pre-vaccination, 3-4-weeks post-dose 1 and 4-weeks  
106 post-dose 2 (range: 19-31 and 25-28 days, respectively) (**Figure 1A**). This study was  
107 conducted according to the principles of the Declaration of Helsinki and approved by local  
108 human research ethics committees.

109

### 110 **Sample processing**

111 Blood samples were processed as previously described.<sup>31</sup> Briefly, 200 µl was used for whole  
112 blood cell counts (Cell Dyn analyzer; Abbott Core Laboratory, Abbott Park, IL) and  
113 Trucount analysis (see flow cytometry section). The remainder of the sample was used to  
114 separate and store plasma (-80°C), and to isolate live peripheral blood mononuclear cells  
115 (PBMC) by Ficoll-paque density gradient centrifugation and cryopreservation at a cell  
116 density of 10 million cells/ml in RPMI medium with 40% FCS and 10% DMSO in liquid  
117 nitrogen for later analysis of RBD-specific B cells.

118

### 119 **Protein production and tetramerization**

120 Recombinant spike RBD proteins of the SARS-CoV-2 Wuhan-1 strain and the Beta, Gamma  
121 and Delta variants were produced with the Fel d 1 leader sequence and a biotin ligase (BirA)

122 AviTag target sequence and a 6His affinity tag at the C-terminus, as described previously.<sup>31</sup>  
123 The RBD from the VoC contained the following mutations: B.1.351 (Beta) K417N, E484K,  
124 N501Y; P.1 (Gamma) K417K, E484K, N501Y; B.1.617.2 (Delta) L452R, T478K. The DNA  
125 constructs were cloned into a pCR3 plasmid and produced and purified, as described  
126 previously.<sup>31</sup> Briefly, plasmid DNA was purified from *E. coli* by Maxiprep (Zymo Research,  
127 Irvine, CA), and 30 µg DNA was transfected into 293F cells using the Expi293 Expression  
128 system (Thermo Fisher Scientific, Waltham, MA). Supernatants were collected and purified  
129 using a Talon NTA-cobalt affinity column (Takara Bio, Kusatsu, Shiga, Japan) with elution  
130 in 200 mM Imidazole. Purified proteins were then dialyzed into 10mM Tris and biotinylated,  
131 as described previously.<sup>31</sup> Biotinylated protein was subsequently dialyzed against 10 mM Tris  
132 for 36 hours at 4°C with minimum of three exchanges, and subsequently stored at -80°C prior  
133 to use. Soluble biotinylated RBD Wuhan protein was tetramerized by the addition of either  
134 Brilliant Ultra Violet (BUV)395-conjugated streptavidin, or streptavidin-BUV737, and  
135 biotinylated RBD Gamma and Delta with streptavidin-BV480 or streptavidin-BV650 (all  
136 from BD Biosciences, San Jose, CA) at a protein:streptavidin molar ratio of 4:1 making 4  
137 unique tetramers, [RBD Wuhan]<sub>4</sub>-BUV395, [RBD Wuhan]<sub>4</sub>-BUV737, [RBD Gamma]<sub>4</sub>-  
138 BV480 and [RBD Delta]<sub>4</sub>-BV650.<sup>31,32</sup>

139

#### 140 **Measurement of SARS-CoV-2 neutralizing antibodies in plasma**

141 Measurement of neutralizing antibodies was performed using SARS-CoV-2 retroviral  
142 pseudotyped particles and a 293T-ACE2 cell line,<sup>33</sup> as described previously.<sup>31,34</sup> Briefly,  
143 plasma was heat inactivated at 56°C for 45 minutes followed by serial dilution in DMF10.  
144 Duplicate serial dilutions were mixed with an equal volume of SARS-CoV-2 (Wuhan-1, Beta,  
145 Gamma or Delta spike) retroviral pseudotyped virus and incubated for 1 hour at 37°C. Virus-  
146 plasma mixtures were added to 293T-ACE2 cell monolayers seeded the day prior at 10,000

147 cells/well, and incubated for 2 hours at 37°C before addition of an equal volume of DMF10  
148 and incubated for 3 days. After incubation, tissue culture fluid was removed, monolayers  
149 were washed once with PBS and lysed with cell culture lysis reagent (Promega, Madison, WI)  
150 and luciferase measured using luciferase substrate (Promega) in a Clariostar plate reader  
151 (BMG LabTechnologies, Offenburg, Germany). The percentage entry was calculated as  
152 described previously<sup>31</sup> and plotted against reciprocal plasma dilution GraphPad Prism 9  
153 Software (GraphPad Software, La Jolla, CA) and curves fitted with a one-site specific  
154 binding Hill plot. The reciprocal dilution of plasma required to prevent 50% virus entry was  
155 calculated from the non-linear regression line (ID50). The lowest amount of neutralizing  
156 antibody detectable is a titer of 20. All samples that did not reach 50% neutralization were  
157 assigned an arbitrary value of 10.

158

## 159 **ELISA**

160 EIA/RIA plates (Costar, St Louis, MO) were coated with 2 µg/ml recombinant SARS-CoV-2  
161 NCP or RBD overnight at 4°C. Wells were blocked with 3% BSA in PBS and subsequently  
162 incubated with plasma samples. Plasma was diluted 1:30 for quantification of RBD- and  
163 NCP-specific antibodies pre-vaccination, post-dose 1 and post-dose 2. Plasma was titrated  
164 from 1:30 to 1:10,000 for quantification of RBD- and RBD variant-specific antibodies post-  
165 dose 1 and 2. Antigen-specific IgG was detected using rabbit anti-human IgG HRP (Dako,  
166 Glostrup, Denmark). ELISA plates were developed using TMB solution (Life Technologies,  
167 Carlsbad, CA) and the reaction was stopped with 1 M HCl. Absorbance (OD450nm) was  
168 measured using a Multiskan Microplate Spectrophotometer (Thermo Fisher Scientific).  
169 Serially diluted recombinant human IgG (in-house made human Rituximab) was used for  
170 quantification of specific IgG in separate wells on the same plate. Area under the curve (AUC)  
171 was calculated for each titration curve using GraphPad Prism software. Relative recognition

172 of the RBD variants was calculated as a percentage of the AUC for that variant relative to the  
173 AUC for RBD Wuhan.

174

### 175 **Flow cytometry**

176 Absolute numbers of leukocyte subsets were determined, as previously described.<sup>31,32,35</sup>  
177 Briefly, 50  $\mu$ l of whole blood was added to a Trucount tube (BD Biosciences) together with  
178 20  $\mu$ l of antibody cocktail containing antibodies to CD3, CD4, CD8, CD16, CD19, CD56 and  
179 CD45 from the 6-color TBNK reagent kit (BD Biosciences) (**Supplementary Tables 1 and**  
180 **2**), and incubated for 15 minutes at room temperature in the dark. Subsequently, samples  
181 were incubated for a further 15 minutes at room temperature with 500  $\mu$ l of 1X BD Lysis  
182 solution (BD Biosciences) to lyse red blood cells. The tube was then stored in the dark at 4°C  
183 for up to 2 hours prior to acquisition on the LSRII or FACSLytic analyzers (BD Biosciences).

184 For detection of antigen-specific Bmem, 12.5 million PBMC were incubated with fixable  
185 viability stain 700 (BD Biosciences), antibodies against CD3, CD19, CD21, CD27, CD38,  
186 CD71, IgA, IgD, IgG1, IgG2, IgG3, IgG4, (**Supplementary Tables 1 and 2**) and 5  $\mu$ g/ml  
187 each of [RBD Wuhan]<sub>4</sub>-BUV395, [RBD Wuhan]<sub>4</sub>-BUV737, [RBD Gamma]<sub>4</sub>-BV480 and  
188 [RBD Delta]<sub>4</sub>-BV650 for 15 minutes at room temperature in a total volume of 250  $\mu$ l FACS  
189 buffer (0.1% sodium azide, 0.2% BSA in PBS). In addition, 5 million PBMC were similarly  
190 incubated with fixable viability stain 700 (BD Biosciences), antibodies against CD3, CD19,  
191 CD27 and IgD, plus BUV395-, BUV737-, BV480- and BV650-conjugated streptavidin  
192 controls (**Supplementary Tables 1 and 2**). Following staining, cells were washed with  
193 FACS buffer, fixed with 2% Paraformaldehyde for 20 minutes at room temperature and  
194 washed once more. Following filtration through a 70  $\mu$ M filter, cells were acquired on the 5-  
195 laser BD LSRFortessa X-20 (BD Biosciences). Flow cytometer set-up and calibration was



196 performed using standardized EuroFlow SOPs, as previously described (**Supplementary**  
197 **Tables 3 and 4**).<sup>31,32,35,36</sup>

198

### 199 **Data analysis and statistics**

200 All flow cytometry data were analyzed with FlowJo v10 software (BD Biosciences).

201 Statistical analysis was performed with GraphPad Prism 9 Software (GraphPad Software).

202 Matched pairs were analyzed with the non-parametric Wilcoxon matched pairs signed rank

203 test. Correlations were performed using the non-parametric Spearman's rank correlation. For

204 all tests,  $p < 0.05$  was considered significant.

## 205 **RESULTS**

### 206 **Robust antibody responses in all donors after two doses of BNT162b2**

207 Blood samples were collected from 30 healthy COVID-19 naive individuals before and after  
208 first and second dose BNT162b2, which were provided with a median of 23 days between  
209 doses (range: 21-39 days). A total of 28 samples were collected pre-vaccination (2 samples  
210 missed) and 30 samples were obtained 3 weeks post-dose 1 as well as 4-weeks post-dose 2  
211 (**Figure 1A**). IgG to SARS-CoV-2 nucleocapsid (NCP) and Spike RBD was evaluated in the  
212 donors before vaccination with BNT162b2 and after dose 1 and dose 2. As the BNT162b2  
213 vaccine only contains mRNA encoding the spike protein, the presence of NCP-specific IgG  
214 would be indicative of previous infection. All participants were SARS-CoV-2 naive: they did  
215 not have NCP-specific antibodies at commencement of the study and remained negative  
216 throughout (**Figure 1B**). None of the participants had detectable IgG to Spike RBD pre-  
217 vaccination, further confirming that all donors were SARS-CoV-2 naive (**Figure 1C**). All  
218 participants generated anti-RBD IgG post-dose 1, and these levels were significantly  
219 increased post-dose 2 (**Figure 1C**). Similarly, none of the participants had neutralizing  
220 antibody levels before vaccination, as evaluated using a pseudotyped viral assay (**Figure**  
221 **1D**).<sup>31</sup> Most individuals (22/30) generated neutralizing antibodies after the first vaccine dose,  
222 and after the second dose all participants carried levels of neutralizing antibodies above an  
223 IC50 of 100 (**Figure 1D**). Thus, BNT162b2 vaccination generates high levels of RBD-  
224 specific IgG and neutralizing antibodies 4 weeks after dose 2.

225

### 226 **Expansion of RBD-specific Bmem expressing IgG1 after two vaccine doses**

227 To examine RBD-specific Bmem generated towards BNT162b2 vaccination, recombinant  
228 RBD-Wuhan protein was biotinylated and tetramerized with fluorescently-labeled  
229 streptavidins. Two tetramers were used to identify RBD-specific B cells: [RBD Wuhan]<sub>4</sub>-

230 BUV395 and [RBD Wuhan]<sub>4</sub>-BUV737.<sup>31</sup> These tetramers were used together with a cocktail  
231 of surface antibodies to identify and extensively immunophenotype total and RBD-specific  
232 Bmem (**Figure 2A, Supplementary Figure 1A**). Within total CD19<sup>+</sup> B cells and RBD-  
233 specific B cells, naive B cells were defined as IgD<sup>+</sup>CD27<sup>-</sup> and excluded from further analysis,  
234 with the remainder of the population deemed Bmem (**Figure 2A, Supplementary Figure**  
235 **1A**). IgD<sup>-</sup> Bmem were then further immunophenotyped using surface antibodies against  
236 IgG1,2,3,4 and IgA (**Figure 2A**). RBD-specific Bmem were detected in all donors after first  
237 and second dose vaccination, with significantly higher numbers post-dose 2 (**Figure 2B**).  
238 Donor age did not appear to affect the generation of RBD-specific Bmem as older individuals  
239 generated similar numbers of cells to younger individuals in the cohort (**Supplementary**  
240 **Figure 2**). The RBD-specific Bmem compartment consisted mostly of IgM<sup>+</sup> or IgG1<sup>+</sup> cells  
241 (**Figure 2C**). In contrast, the total Bmem population contained fewer IgG1<sup>+</sup> cells and more  
242 IgG2<sup>+</sup> than the RBD-specific Bmem (**Figure 2C, Supplementary Figure 1B**). After dose 2,  
243 RBD-specific IgG1, IgG2 and IgG3 Bmem populations were significantly expanded whereas  
244 the total Bmem compartment remained unchanged (**Figure 2C, Supplementary Figures 1B**  
245 **and 2**). The total numbers of RBD-specific IgG<sup>+</sup> Bmem were positively correlated with  
246 RBD-specific plasma IgG after both vaccine doses (**Figure 2D, Supplementary Figure 3**).  
247 While the two IgM<sup>+</sup> Bmem subsets (CD27<sup>+</sup> IgM<sup>+</sup> IgD<sup>+</sup> and CD27<sup>+</sup>IgM<sup>+</sup> only) were  
248 proportionally reduced after dose 2, their absolute numbers were similar to dose 1 (**Figure**  
249 **2C**). Within the total Bmem compartment, no changes were observed between the samples  
250 obtained after dose 1 vs dose 2 (**Supplementary Figure 1B**). Thus, BNT162b2 vaccination  
251 specifically affects the antigen-specific Bmem, and the second dose boosts the formation of  
252 IgG1<sup>+</sup> Bmem.

253

254 **RBD-specific Bmem exhibit a resting memory phenotype 3-4 weeks after vaccination**

255 The nature of RBD-specific Bmem was further examined on the basis of CD21, CD27 and  
256 CD71 expression (**Figure 3A**). CD27 marks a population of IgG<sup>+</sup> Bmem with higher antigen-  
257 driven replication and signs of antibody maturation than the IgG<sup>-</sup> counterpart.<sup>16</sup>  
258 Approximately 95% of RBD-specific IgG<sup>+</sup> Bmem expressed CD27, and this proportion was  
259 not different between first and second dose vaccination (**Figure 3C**). Low expression of  
260 CD21 marks recently activated Bmem, which were shown to expand after influenza  
261 vaccination followed by contraction at week 4.<sup>29</sup> After BNT162b2 dose 1, approximately 15%  
262 of the RBD-specific Bmem were CD21<sup>lo</sup>. This proportion was slightly, but significantly,  
263 lower (to 10%) 4 weeks after the second dose (**Figure 3C**). CD71 is another marker of recent  
264 Bmem activation, typically expressed after 1-2 weeks and downregulated by week 4.<sup>30</sup>  
265 Approximately 10% of RBD-specific Bmem expressed CD71 both after dose 1 and after dose  
266 2. Within the total Bmem population, no significant differences were observed post-dose 1 vs  
267 post-dose 2, demonstrating the stability of the overall Bmem compartment (**Supplementary**  
268 **Figure 1**). Thus, we have established that 4 weeks after BNT162b2 vaccination, RBD-  
269 specific Bmem display a resting, mature Bmem immunophenotype.

270

## 271 **The second vaccine dose boosts the capacity of RBD-specific Bmem to recognize SARS-** 272 **CoV-2 variants of concern**

273 With the first BNT162b2 dose already inducing plasma antibodies and a resting, mature  
274 Bmem population, which are further expanded after dose 2, we examined the capacity of  
275 these cells to recognize VoC with antibody evasion mutations: Beta and Gamma (E484K)  
276 and Delta (L452R) (**Figure 4A**).<sup>37</sup> Vaccine-induced antibodies were evaluated for their  
277 ability to bind variants through ELISA and the pseudotyped neutralization assay.<sup>31</sup> RBD  
278 Wuhan-specific plasma IgG showed partial recognition against all three variants with a more  
279 profound decrease observed for Beta and Gamma than for Delta (**Figure 4B**). The second

280 dose of BNT162b2 significantly increased the proportion of Wuhan RBD-specific antibodies  
281 able to bind Beta and Gamma (**Figure 4B**). Still the capacity of vaccine generated antibodies  
282 to neutralize Beta and Gamma was lower than for the Delta variant, supporting the ELISA  
283 results (**Figure 4C**). To evaluate the recognition of RBD-specific Bmem to VoC, tetramers of  
284 RBD Gamma and RBD Delta were generated. Combined staining with fluorochrome-  
285 conjugated RBD Wuhan tetramers enabled the RBD-specific cells that bound to either RBD  
286 Gamma, Delta or neither variant (**Figure 4D**). The Gamma and Delta RBD were each  
287 recognized by approximately 50% of RBD-specific Bmem. After the second dose these  
288 proportions both significantly increased to 70% (**Figure 4E**). The increased proportion of  
289 RBD-specific Bmem that recognized either or both variants were mainly due to an increase in  
290 IgG1<sup>+</sup> Bmem (**Supplementary Figure 4**).

291

292 In summary, double-dose BNT162b2 vaccination effectively elicits RBD-specific IgG,  
293 SARS-CoV-2 neutralizing antibodies and RBD-specific Bmem. The second dose enhances  
294 the response quantitatively, and improves the capacity of antibodies and Bmem cells to bind  
295 mutated RBD domains from the VoC.

296

297 **DISCUSSION**

298 We show herein that the first dose of BNT162b2 vaccination robustly induces SARS-CoV-2-  
299 specific plasma antibodies and Bmem. RBD-specific Bmem are expanded after dose 2 and  
300 display an enhanced capacity to bind to VoC.

301 The production of RBD-specific and neutralizing antibodies following BNT162b2  
302 vaccination has been well-characterized showing rapid production of antibodies within 1  
303 month of vaccination.<sup>12,14,15,27,38</sup> Interestingly, not all individuals in our cohort generate  
304 neutralizing antibodies after one dose of vaccine, but do so after the second dose. This  
305 observation recapitulates results from other cohorts, and demonstrates the need for the  
306 double-dose primary schedule.<sup>12,14</sup> Neutralizing antibodies prevent ACE2 binding and viral  
307 entry into host cells,<sup>9,10</sup> and the levels correlate strongly with vaccine effectiveness.<sup>39</sup>  
308 However, it remains unclear whether serum antibodies are representative of those in the  
309 upper airways, the entry site for SARS-CoV-2. Therefore, serum neutralizing antibodies may  
310 not be an accurate marker of vaccine protection and effectiveness. Furthermore, as levels of  
311 neutralizing antibodies decline beyond 1-month post-vaccination,<sup>11-15</sup> these do not represent  
312 the durable protection from severe disease that lasts 3-6 months.<sup>39</sup>

313 In contrast to plasma Ig, SARS-CoV-2-specific Bmem are maintained in stable number  
314 after infection and vaccination.<sup>15,40</sup> We here show that the first vaccine dose elicits the  
315 formation of RBD-specific Bmem with a resting phenotype (CD27<sup>+</sup>CD71<sup>-</sup>) after 3 weeks, i.e.  
316 prior to the administration of the second dose of BNT162b2. The second dose likely induces  
317 re-activation of these pre-existing Bmem and differentiation into plasmablasts responsible for  
318 the rise in RBD-specific plasma IgG and neutralizing antibodies. This indicates that vaccine-  
319 induced RBD-specific Bmem are functional and may contribute to protection from severe  
320 disease after infection. Other studies have also shown a predominant IgG<sup>+</sup> Bmem response  
321 after two SARS-CoV-2 vaccine doses, in which the proportion of IgG<sup>+</sup> Bmem increased with

322 a reciprocal decrease in IgM<sup>+</sup> Bmem frequencies.<sup>12,14</sup> We here expand on this by showing  
323 that the Bmem response to the second dose of BNT162b2 vaccination is dominated by IgG1<sup>+</sup>  
324 cells. Furthermore, through analysis of absolute cell numbers per milliliter of blood, we show  
325 that this is an absolute expansion of IgG1<sup>+</sup> RBD-specific Bmem, while IgM<sup>+</sup> Bmem numbers  
326 remain at a similar level. Importantly, we note that IgA expressing Bmem are formed in  
327 lower frequency and number compared to SARS-CoV-2 infection.<sup>31</sup> However, based on the  
328 study design of sampling peripheral blood it is difficult to interpret their impact in mucosal  
329 upper airway tissues.

330 The predominance of RBD-specific Bmem expressing IgG1 reflects the serological  
331 response, which has been shown to be dominated by plasma IgG1 antibodies.<sup>12</sup> We also show  
332 that the number of RBD-specific Bmem positively correlate with RBD-specific IgG in the  
333 plasma. The presence of high numbers of IgG1<sup>+</sup> Bmem also indicates that the second dose re-  
334 activates pre-existing Bmem to not only form plasmablasts, but also directs cells to re-enter a  
335 GC and undergo further Ig class switching and affinity maturation. GC reactions following  
336 SARS-CoV-2 vaccination are maintained up to 7 months post-vaccination, and are thought to  
337 drive the observed gradual rise in SHM levels.<sup>41</sup> It would therefore be of interest for future  
338 studies to examine longitudinal samples beyond 6 months post-vaccination, or after booster  
339 doses for ongoing class switching to downstream Ig genes (ie. IgG2 and IgG4)<sup>17</sup> and further  
340 affinity maturation.

341 The question remains, how durable are the numbers of SARS-CoV-2-specific Bmem  
342 following adenoviral vaccination? While recent studies have examined the protection against  
343 this vaccine formulation,<sup>42-44</sup> the longevity of this protection is yet to be fully characterized.  
344 Antibody responses to two doses of adenoviral vaccination are significantly lower compared  
345 to mRNA vaccination.<sup>42,45-47</sup> However, one dose of ChAdOx1 nCoV-19 followed by one dose  
346 of BNT162b2 generates similar antibody levels to two doses of BNT162b2.<sup>43-45,48</sup> Therefore,

347 an mRNA booster vaccination in individuals that received primary adenoviral vector  
348 vaccination provides the same protection as a third dose of mRNA vaccine.<sup>47,49-51</sup> Durability  
349 following mRNA vaccination has been more extensively characterized. Spike-specific Bmem  
350 remain in stable frequencies for up to 6 months post-vaccination.<sup>12,14,15</sup> Responses following  
351 a third dose further increases the frequency of these cells and also their ability to bind  
352 variants.<sup>40,52</sup>

353 VoC are now a major threat to the protection that COVID-19 vaccines provide. Mutated  
354 RBD proteins in our study, representing the Beta, Gamma and Delta VoC, all demonstrated  
355 reduced antibody recognition.<sup>20,21,23-25</sup> Hence, we can use the antibody and Bmem cell  
356 responses to these VoC as a model of variants that partially escape the current Wuhan based  
357 BNT162b2 vaccination. We show that the second vaccine dose increased the capacity of  
358 antibodies and Bmem to bind VoC. This suggests that the second dose of vaccination  
359 increases the affinity of Bmem, enabling these to overcome the minor changes in the RBD  
360 and still bind variant RBDs with sufficient affinity. This is in agreement with other  
361 observations that Ig genes from variant-binding Bmem have higher SHM levels than those  
362 that only bind to Wuhan<sup>15</sup> However, with the high number of RBD mutations in the current  
363 Omicron (B.1.1.529) subvariants, the vaccine-elicited Bmem might not have the capacity to  
364 overcome the mismatches.<sup>40,53-55</sup> Still, a third-dose booster vaccination with the Wuhan Spike  
365 has been shown to improve antibody and Bmem binding to Omicron BA.1.<sup>40</sup> Thus, the  
366 current vaccine formulation does appear to provide protection that improves with multiple  
367 doses.<sup>40</sup> Importantly, Omicron breakthrough responses after double-dose vaccination do not  
368 elicit greater capacities of antibodies or Bmem to bind the Omicron Spike protein than  
369 Wuhan vaccination.<sup>54,56</sup> Furthermore, all Bmem after breakthrough infection bind Wuhan  
370 with greater affinity than Omicron, indicating that a variant infection does not elicit Bmem  
371 with new specificities, ie. Original antigenic sin.<sup>57,58</sup> However, we have shown that repeat



372 exposure double dose vaccination increases the capacity of Wuhan-specific Bmem to  
373 recognize VoC.

374 It will be critical to examine the protection the BNT162b2 vaccination provides against  
375 emerging VoC. Furthermore, if new VoC emerge, current SARS-CoV-2 vaccines may need  
376 to incorporate variant epitopes that will elicit new variant-specific antibodies and Bmem.  
377 Overall, we have shown that BNT162b2 vaccination generates a strong antibody and Bmem  
378 response. The second dose of BNT162b2 vaccine is required for increased recognition of  
379 VoC. As VoC are the dominant strains across the globe, it is critical to ensure that multiple  
380 dose SARS- CoV-2 vaccinations are continued, and to monitor their ability to protect against  
381 severe disease caused by new variants.

382

### 383 **ACKNOWLEDGEMENTS**

384 We thank Dr. Bruce D. Wines and Ms. Sandra Esparon (Burnet Institute) for technical  
385 assistance, Mr. Jack Edwards and Ms. Ebony Blight (Monash University) for sample  
386 collection and preparation, and the staff of ARAFlowcore for flow cytometry support.  
387 Supported by an Australian Government Medical Research Future Fund (MRFF, Project no.  
388 2016108; MCvZ, HED and REO'H) and an unrestricted research grant from BD.

389

### 390 **CONFLICTS OF INTEREST**

391 MCvZ, REO'H and PMH are inventors on a patent application related to this work. SJB is an  
392 employee of and owns stock in BD. All the other authors declare no conflict of interest.

393

### 394 **AUTHOR CONTRIBUTIONS**

395 Designed and/or performed experiments: GEH, ESJE, NV, IB, PMA, PMH, HED, REO'H  
396 and MCvZ; Formal analysis: GEH, NV, IB and PMA; Provided reagents: SJB; Supervised

397 the work: ESJE, REO'H and MCvZ; Wrote the manuscript: GEH and MCvZ. All authors  
398 edited and approved the final version of the manuscript.

399

400 **ORCID**

401 **GEH:** 0000-0002-3174-231X

402 **ESJE:** 0000-0002-0240-4370

403 **NV:** 0000-0001-9074-3710

404 **IB:** 0000-0003-0923-0972

405 **PMA:** 0000-0002-2314-9989

406 **PMH:** 0000-0002-0360-7890

407 **HED:** 0000-0002-0042-6277

408 **REO'H:** 0000-0002-3489-7595

409 **MCvZ:** 0000-0003-4161-1919

## 410 REFERENCES

- 411 1. Polack FP, Thomas SJ, Kitchin N, et al. Safety and Efficacy of the BNT162b2 mRNA  
412 Covid-19 Vaccine. *N Engl J Med.* 2020;383(27):2603-2615.
- 413 2. World Health Organisation. WHO Coronavirus (COVID-19) Dashboard. 2022;  
414 <https://covid19.who.int/>. Accessed 21/4/22.
- 415 3. Baden LR, El Sahly HM, Essink B, et al. Efficacy and Safety of the mRNA-1273 SARS-  
416 CoV-2 Vaccine. *N Engl J Med.* 2021;384(5):403-416.
- 417 4. Folegatti PM, Ewer KJ, Aley PK, et al. Safety and immunogenicity of the ChAdOx1  
418 nCoV-19 vaccine against SARS-CoV-2: a preliminary report of a phase 1/2, single-blind,  
419 randomised controlled trial. *Lancet.* 2020;396(10249):467-478.
- 420 5. Tartof SY, Slezak JM, Fischer H, et al. Effectiveness of mRNA BNT162b2 COVID-19  
421 vaccine up to 6 months in a large integrated health system in the USA: a retrospective  
422 cohort study. *Lancet.* 2021;398(10309):1407-1416.
- 423 6. Haas EJ, Angulo FJ, McLaughlin JM, et al. Impact and effectiveness of mRNA  
424 BNT162b2 vaccine against SARS-CoV-2 infections and COVID-19 cases,  
425 hospitalisations, and deaths following a nationwide vaccination campaign in Israel: an  
426 observational study using national surveillance data. *Lancet.* 2021;397(10287):1819-  
427 1829.
- 428 7. Australian Government Department of Health. COVID-19 vaccine rollout update – 24  
429 March 2022. 2022; [https://www.health.gov.au/resources/publications/covid-19-vaccine-  
430 rollout-update-24-march-2022](https://www.health.gov.au/resources/publications/covid-19-vaccine-rollout-update-24-march-2022). Accessed 21/4/22.
- 431 8. Australian Government Department of Health. COVID-19 vaccine doses and  
432 administration. 2022; [https://www.health.gov.au/initiatives-and-programs/covid-19-  
433 vaccines/advice-for-providers/clinical-guidance/doses-and-administration](https://www.health.gov.au/initiatives-and-programs/covid-19-vaccines/advice-for-providers/clinical-guidance/doses-and-administration). Accessed  
434 16/4/22.
- 435 9. Robbiani DF, Gaebler C, Muecksch F, et al. Convergent antibody responses to SARS-  
436 CoV-2 in convalescent individuals. *Nature.* 2020;584(7821):437-442.
- 437 10. Suthar MS, Zimmerman MG, Kauffman RC, et al. Rapid Generation of Neutralizing  
438 Antibody Responses in COVID-19 Patients. *Cell Rep Med.* 2020;1(3):100040.
- 439 11. Cho A, Muecksch F, Schaefer-Babajew D, et al. Anti-SARS-CoV-2 receptor-binding  
440 domain antibody evolution after mRNA vaccination. *Nature.* 2021;600(7889):517-522.
- 441 12. Ciabattini A, Pastore G, Fiorino F, et al. Evidence of SARS-CoV-2-Specific Memory B  
442 Cells Six Months After Vaccination With the BNT162b2 mRNA Vaccine. *Front*  
443 *Immunol.* 2021;12:740708.
- 444 13. Levin EG, Lustig Y, Cohen C, et al. Waning Immune Humoral Response to BNT162b2  
445 Covid-19 Vaccine over 6 Months. *N Engl J Med.* 2021;385(24):e84.
- 446 14. Goel RR, Apostolidis SA, Painter MM, et al. Distinct antibody and memory B cell  
447 responses in SARS-CoV-2 naïve and recovered individuals following mRNA  
448 vaccination. *Sci Immunol.* 2021;6(58).
- 449 15. Goel RR, Painter MM, Apostolidis SA, et al. mRNA vaccines induce durable immune  
450 memory to SARS-CoV-2 and variants of concern. *Science.* 2021;374(6572):abm0829.

- 451 16. Berkowska MA, Driessen GJ, Bikos V, et al. Human memory B cells originate from  
452 three distinct germinal center-dependent and -independent maturation pathways. *Blood*.  
453 2011;118(8):2150-2158.
- 454 17. de Jong BG, H IJ, Marques L, et al. Human IgG2- and IgG4-expressing memory B cells  
455 display enhanced molecular and phenotypic signs of maturity and accumulate with age.  
456 *Immunol Cell Biol*. 2017;95(9):744-752.
- 457 18. van Zelm MC, Szczepanski T, van der Burg M, van Dongen JJ. Replication history of B  
458 lymphocytes reveals homeostatic proliferation and extensive antigen-induced B cell  
459 expansion. *J Exp Med*. 2007;204(3):645-655.
- 460 19. World Health Organisation. Tracking SARS-CoV-2 variants. 2022;  
461 <https://www.who.int/en/activities/tracking-SARS-CoV-2-variants/>. Accessed 21/4/22.
- 462 20. Wall EC, Wu M, Harvey R, et al. Neutralising antibody activity against SARS-CoV-2  
463 VOCs B.1.617.2 and B.1.351 by BNT162b2 vaccination. *Lancet*.  
464 2021;397(10292):2331-2333.
- 465 21. Zhou D, Dejnirattisai W, Supasa P, et al. Evidence of escape of SARS-CoV-2 variant  
466 B.1.351 from natural and vaccine-induced sera. *Cell*. 2021;184(9):2348-2361.e2346.
- 467 22. Tong P, Gautam A, Windsor IW, et al. Memory B cell repertoire for recognition of  
468 evolving SARS-CoV-2 spike. *Cell*. 2021;184(19):4969-4980.e4915.
- 469 23. Augusto G, Mohsen MO, Zinkhan S, Liu X, Vogel M, Bachmann MF. In vitro data  
470 suggest that Indian delta variant B.1.617 of SARS-CoV-2 escapes neutralization by both  
471 receptor affinity and immune evasion. *Allergy*. 2022;77(1):111-117.
- 472 24. Liu C, Ginn HM, Dejnirattisai W, et al. Reduced neutralization of SARS-CoV-2 B.1.617  
473 by vaccine and convalescent serum. *Cell*. 2021;184(16):4220-4236.e4213.
- 474 25. Garcia-Valtanen P, Hope CM, Masavuli MG, et al. SARS-CoV-2 Omicron variant  
475 escapes neutralizing antibodies and T cell responses more efficiently than other variants  
476 in mild COVID-19 convalescents. *Cell Rep Med*. 2022:100651.
- 477 26. McCallum M, Bassi J, De Marco A, et al. SARS-CoV-2 immune evasion by the  
478 B.1.427/B.1.429 variant of concern. *Science*. 2021;373(6555):648-654.
- 479 27. Sokal A, Barba-Spaeth G, Fernández I, et al. mRNA vaccination of naive and COVID-  
480 19-recovered individuals elicits potent memory B cells that recognize SARS-CoV-2  
481 variants. *Immunity*. 2021;54(12):2893-2907.e2895.
- 482 28. Australian Government Department of Health. Coronavirus (COVID-19) case numbers  
483 and statistics. 2022; [https://www.health.gov.au/health-alerts/covid-19/case-numbers-and-](https://www.health.gov.au/health-alerts/covid-19/case-numbers-and-statistics#cases-by-state-and-territory)  
484 [statistics#cases-by-state-and-territory](https://www.health.gov.au/health-alerts/covid-19/case-numbers-and-statistics#cases-by-state-and-territory). Accessed 16/6/22.
- 485 29. Andrews SF, Chambers MJ, Schramm CA, et al. Activation Dynamics and  
486 Immunoglobulin Evolution of Pre-existing and Newly Generated Human Memory B cell  
487 Responses to Influenza Hemagglutinin. *Immunity*. 2019;51(2):398-410.e395.
- 488 30. Ellebedy AH, Jackson KJ, Kissick HT, et al. Defining antigen-specific plasmablast and  
489 memory B cell subsets in human blood after viral infection or vaccination. *Nat Immunol*.  
490 2016;17(10):1226-1234.
- 491 31. Hartley GE, Edwards ESJ, Aui PM, et al. Rapid generation of durable B cell memory to  
492 SARS-CoV-2 spike and nucleocapsid proteins in COVID-19 and convalescence. *Sci*  
493 *Immunol*. 2020;5(54).

- 494 32. Hartley GE, Edwards ESJ, Bosco JJ, et al. Influenza-specific IgG1(+) memory B-cell  
495 numbers increase upon booster vaccination in healthy adults but not in patients with  
496 predominantly antibody deficiency. *Clin Transl Immunology*. 2020;9(10):e1199.
- 497 33. Crawford KHD, Eguia R, Dingens AS, et al. Protocol and Reagents for Pseudotyping  
498 Lentiviral Particles with SARS-CoV-2 Spike Protein for Neutralization Assays. *Viruses*.  
499 2020;12(5).
- 500 34. Jackson LA, Anderson EJ, Rouphael NG, et al. An mRNA Vaccine against SARS-CoV-  
501 2 - Preliminary Report. *N Engl J Med*. 2020;383(20):1920-1931.
- 502 35. Edwards ESJ, Bosco JJ, Aui PM, et al. Predominantly Antibody-Deficient Patients With  
503 Non-infectious Complications Have Reduced Naive B, Treg, Th17, and Tfh17 Cells.  
504 *Front Immunol*. 2019;10:2593.
- 505 36. Kalina T, Flores-Montero J, van der Velden VH, et al. EuroFlow standardization of flow  
506 cytometer instrument settings and immunophenotyping protocols. *Leukemia*.  
507 2012;26(9):1986-2010.
- 508 37. Servellita V, Morris MK, Sotomayor-Gonzalez A, et al. Predominance of antibody-  
509 resistant SARS-CoV-2 variants in vaccine breakthrough cases from the San Francisco  
510 Bay Area, California. *Nat Microbiol*. 2022.
- 511 38. Sahin U, Muik A, Vogler I, et al. BNT162b2 vaccine induces neutralizing antibodies and  
512 poly-specific T cells in humans. *Nature*. 2021;595(7868):572-577.
- 513 39. Khoury DS, Cromer D, Reynaldi A, et al. Neutralizing antibody levels are highly  
514 predictive of immune protection from symptomatic SARS-CoV-2 infection. *Nat Med*.  
515 2021;27(7):1205-1211.
- 516 40. Goel RR, Painter MM, Lundgreen KA, et al. Efficient recall of Omicron-reactive B cell  
517 memory after a third dose of SARS-CoV-2 mRNA vaccine. *Cell*. 2022.
- 518 41. Kim W, Zhou JQ, Horvath SC, et al. Germinal centre-driven maturation of B cell  
519 response to mRNA vaccination. *Nature*. 2022;604(7904):141-145.
- 520 42. Kim JY, Lim SY, Park S, et al. Immune Responses to the ChAdOx1 nCoV-19 and  
521 BNT162b2 Vaccines and to Natural Coronavirus Disease 2019 Infections Over a 3-  
522 Month Period. *J Infect Dis*. 2022;225(5):777-784.
- 523 43. Barros-Martins J, Hammerschmidt SI, Cossmann A, et al. Immune responses against  
524 SARS-CoV-2 variants after heterologous and homologous ChAdOx1 nCoV-  
525 19/BNT162b2 vaccination. *Nat Med*. 2021;27(9):1525-1529.
- 526 44. Wang Z, Muecksch F, Muenn F, et al. Humoral immunity to SARS-CoV-2 elicited by  
527 combination COVID-19 vaccination regimens. *bioRxiv*. 2022:2022.2005.2013.491823.
- 528 45. Tenbusch M, Schumacher S, Vogel E, et al. Heterologous prime-boost vaccination with  
529 ChAdOx1 nCoV-19 and BNT162b2. *Lancet Infect Dis*. 2021;21(9):1212-1213.
- 530 46. Zhang Z, Mateus J, Coelho CH, et al. Humoral and cellular immune memory to four  
531 COVID-19 vaccines. *Cell*. 2022;185(14):2434-2451.e2417.
- 532 47. GeurtsvanKessel CH, Geers D, Schmitz KS, et al. Divergent SARS-CoV-2 Omicron-  
533 reactive T and B cell responses in COVID-19 vaccine recipients. *Sci Immunol*.  
534 2022;7(69):eabo2202.

- 535 48. Kaku CI, Champney ER, Normark J, et al. Broad anti-SARS-CoV-2 antibody immunity  
536 induced by heterologous ChAdOx1/mRNA-1273 vaccination. *Science*.  
537 2022;375(6584):1041-1047.
- 538 49. Natarajan K, Prasad N, Dascomb K, et al. Effectiveness of Homologous and  
539 Heterologous COVID-19 Booster Doses Following 1 Ad.26.COV2.S (Janssen [Johnson  
540 & Johnson]) Vaccine Dose Against COVID-19-Associated Emergency Department and  
541 Urgent Care Encounters and Hospitalizations Among Adults - VISION Network, 10  
542 States, December 2021-March 2022. *MMWR Morb Mortal Wkly Rep*. 2022;71(13):495-  
543 502.
- 544 50. Mayr FB, Talisa VB, Shaikh O, Yende S, Butt AA. Effectiveness of Homologous or  
545 Heterologous Covid-19 Boosters in Veterans. *N Engl J Med*. 2022;386(14):1375-1377.
- 546 51. Au WY, Cheung PP. Effectiveness of heterologous and homologous covid-19 vaccine  
547 regimens: living systematic review with network meta-analysis. *Bmj*. 2022;377:e069989.
- 548 52. Garcia-Beltran WF, St Denis KJ, Hoelzemer A, et al. mRNA-based COVID-19 vaccine  
549 boosters induce neutralizing immunity against SARS-CoV-2 Omicron variant. *Cell*.  
550 2022;185(3):457-466.e454.
- 551 53. Chen Y, Tong P, Whiteman N, et al. Immune recall improves antibody durability and  
552 breadth to SARS-CoV-2 variants. *Sci Immunol*. 2022:eabp8328.
- 553 54. Kaku CI, Bergeron AJ, Ahlm C, et al. Recall of pre-existing cross-reactive B cell  
554 memory following Omicron BA.1 breakthrough infection. *Sci Immunol*. 2022:eabq3511.
- 555 55. Evans JP, Zeng C, Qu P, et al. Neutralization of SARS-CoV-2 Omicron sub-lineages  
556 BA.1, BA.1.1, and BA.2. *Cell Host Microbe*. 2022.
- 557 56. Quandt J, Muik A, Salisch N, et al. Omicron BA.1 breakthrough infection drives cross-  
558 variant neutralization and memory B cell formation against conserved epitopes. *Sci*  
559 *Immunol*. 2022:eabq2427.
- 560 57. van Zelm MC. Immune memory to SARS-CoV-2 Omicron BA.1 breakthrough infections:  
561 To change the vaccine or not? *Sci Immunol*. 2022:eabq5901.
- 562 58. Francis T. On the Doctrine of Original Antigenic Sin. *Proceedings of the American*  
563 *Philosophical Society*. 1960;104(6):572-578.
- 564 59. Vietheer PT, Boo I, Gu J, et al. The core domain of hepatitis C virus glycoprotein E2  
565 generates potent cross-neutralizing antibodies in guinea pigs. *Hepatology*.  
566 2017;65(4):1117-1131.

567 **FIGURES (n=4)**

568

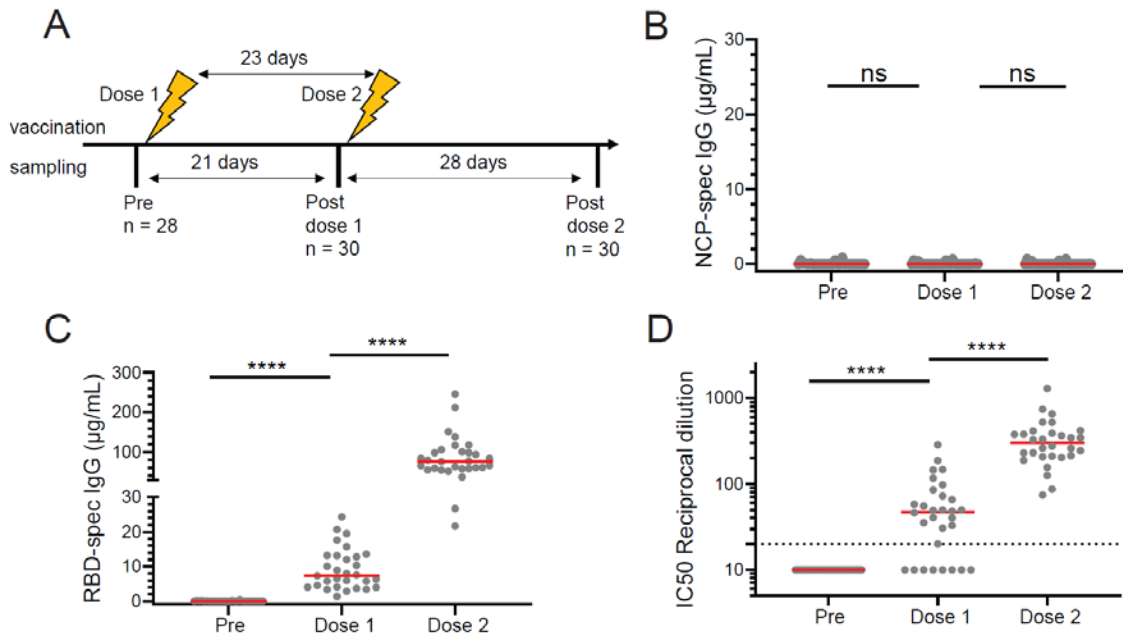

569

570 **Figure 1. Serological responses BNT162b2 Pfizer vaccination.** (A) Participants were  
571 sampled pre-BNT162b2 vaccination, 3 weeks after dose 1 and 4 weeks after dose 2. (B)  
572 NCP-specific and (C) RBD-specific plasma IgG post-vaccination. (D) Neutralizing  
573 antibodies to Wuhan post-vaccination. Dotted line in D depicts IC<sub>50</sub> = 20, the cut off for  
574 neutralization.<sup>59</sup> Horizontal lines represent median values. Wilcoxon matched-pairs signed  
575 rank test, \*\*\*\* p < 0.0001.



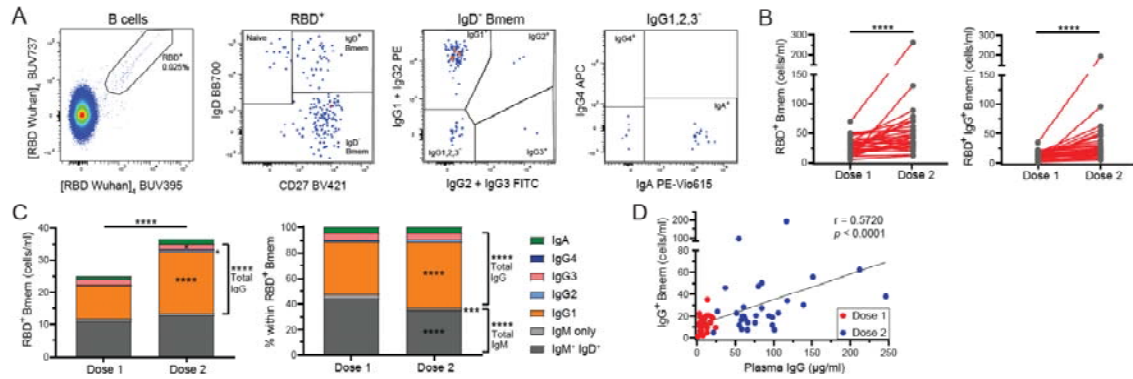

576

577

**Figure 2. Identification of RBD-specific Bmem elicited by BNT162b2 vaccination. (A)**

578

Gating strategy and immunophenotype of RBD-specific memory B cells (Bmem) using RBD

579

Wuhan tetramers. (B) Absolute number of RBD-specific Bmem and IgG<sup>+</sup> Bmem in

580

vaccinated individuals. (C) Absolute number and proportion of Ig switched RBD-specific

581

Bmem. Wilcoxon matched-pairs signed rank test, \*  $p < 0.05$ , \*\*\*  $p < 0.001$ , \*\*\*\*  $p < 0.0001$ .

582

(D) Correlation between plasma IgG and IgG<sup>+</sup> RBD-specific Bmem after dose 1 and dose 2.

583

Trend line depicts linear correlations; statistics, nonparametric Spearman's rank correlation.

584



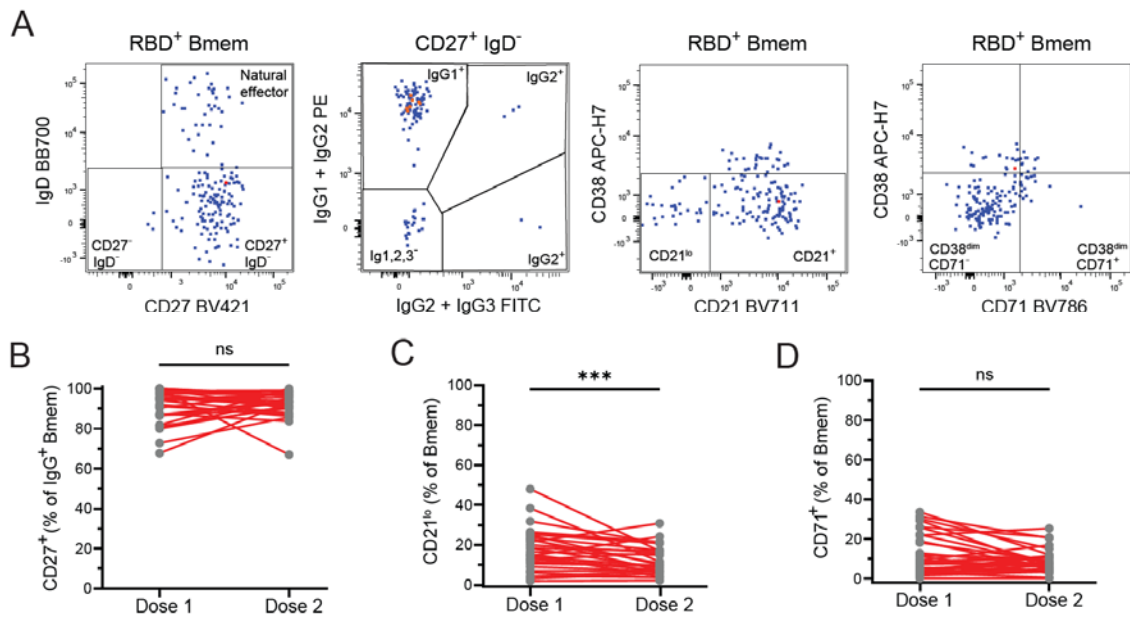

585

586

**Figure 3. RBD-specific Bmem exhibit a resting phenotype 4 weeks after dose 2 of**

587 **BNT162b2 vaccination.** (A) Gating strategy to delineate CD27<sup>+</sup>, CD21<sup>lo</sup> and CD71<sup>+</sup> RBD-

588 specific Bmem. (B) Frequency of RBD-specific IgG<sup>+</sup> Bmem that express CD27. (C)

589 Frequency of CD21<sup>lo</sup> RBD-specific Bmem. (D) Frequency of CD71<sup>+</sup> RBD-specific Bmem.

590 Wilcoxon matched-pairs signed rank test, \*\*\* p<0.001.

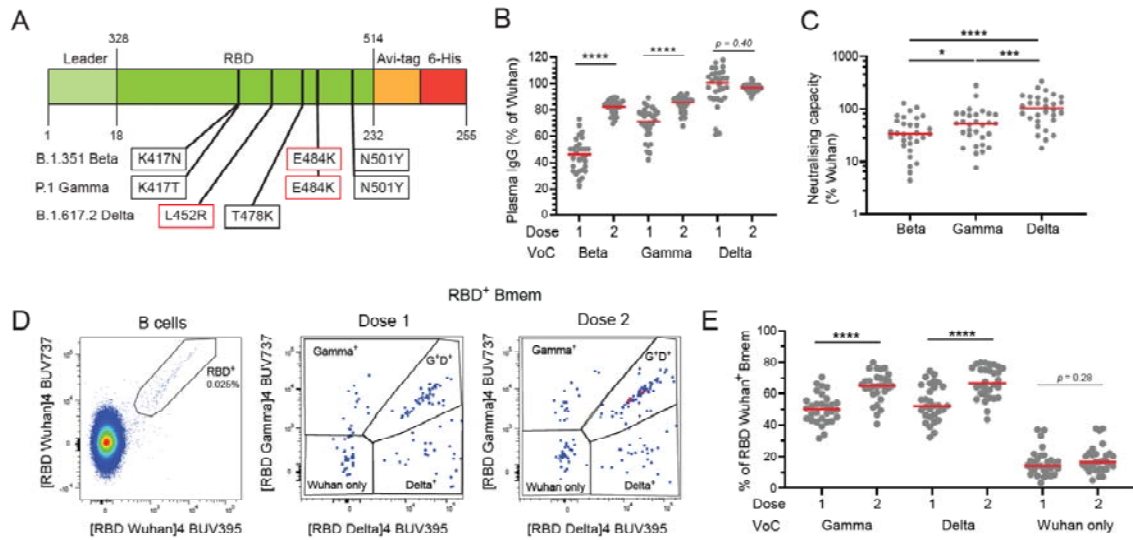

591

592

**Figure 4. Second BNT162b2 dose increases recognition of variants of concern by RBD-**

593

**specific antibodies and Bmem.** (A) Schematic of point mutations in the RBD for Beta,

594

Gamma and Delta variants. Mutations in red cause a reduction in antibody recognition.<sup>22,37</sup> (B)

595

Proportion of RBD-specific IgG that also bind VoC Beta, Gamma and Delta after dose 1 and

596

2. (C) Neutralizing capacity of Wuhan spike-specific antibodies against Beta, Gamma and

597

Delta VoC. (D) Gating strategy to identify RBD-specific Bmem that also bind RBD Gamma

598

and/or Delta. (E) Proportion of RBD-specific Bmem that also bind Gamma, Delta or no

599

variants. Wilcoxon matched-pairs signed rank test, \*  $p < 0.05$ , \*\*\*  $p < 0.001$ , \*\*\*\*  $p <$

600

0.0001.
